# Supplementary material for: Pigs with δ-sarcoglycan deficiency exhibit traits of genetic cardiomyopathy
Source: PubMed Central journal article supplement (PMC7280178; doi:10.1038/s41374-020-0406-7), 2020-02-14
Supplement: 41374_2020_406_MOESM1_ESM.pdf [file 41374_2020_406_MOESM1_ESM.pdf]

## **Supplementary Information**

### **Pigs with $\delta$ -sarcoglycan deficiency exhibit traits of genetic cardiomyopathy**

Hitomi Matsunari, Michiyo Honda, Masahito Watanabe, Satsuki Fukushima, Kouta Suzuki, Shigeru Miyagawa, Kazuaki Nakano, Kazuhiro Umeyama, Ayuko Uchikura, Kazutoshi Okamoto, Masaki Nagaya, Teruhiko Toyo-oka, Yoshiki Sawa, and Hiroshi Nagashima

**a**

```

ttccagcctctccacacacgcctcctggactgtgcggggttctcaccagccgctttgtgc 60
gaagaagacaagagagATGCCTCAGGAACAGTACACACCACCGGAGCACCATGCCCAG 120
      M P Q E Q Y T H H R S T M P S
CTCCGAGGGGCCACAGGTATACAAAGTAGGGATTACGGCTGGCGGAAAAGATGCTTGTA 180
S E G P Q V Y K V G I Y G W R K R C L Y
TTTCTTTGTCTACTCCTGATGATTTTAATACTGGTGAACCTGGCCATGACCATCTGGAT 240
F F V L L L M I L I L V N L A M T I W I
TCTCAAAGTCATGAACCTCACAAATGATGGAATGGGAACTTGAAGATCACAGAAAAGG 300
L K V M N F T I D G M G N L R I T E K G
TCTAAAGTTAGAAGGAGACTCAGAATTCCTACAACCTCTGTACGCCAAAGAAATCCAGTC 360
L K L E G D S E F L Q P L Y A K E I Q S
CCGACCAGGTAATGCCCTGTACTTCAAATCTGCCAGAAATGTTACTGTGAACATCCTCAA 420
R P G N A L Y F K S A R N V T V N I L N
TGAACAGACTAAAGTGCTAACTCAGCTGATAACAGGTCCAAATGCCATAGAAGCTTATGG 480
E Q T K V L T Q L I T G P N A I E A Y G
CAAAAAGTTGAAGTAAAGACGGTTTCTGGAAAATGCTCTTCTCTGCAGATAACAATGA 540
K K F E V K T V S G K L L F S A D N N E
AGTCGTAGTGGGAGCTGAAAGATTGAGAGTTTTAGGAGCAGAGGGCACAGTGTCCCTAA 600
V V V G A E R L R V L G A E G T V F P K
ATCTATAGAGACACCTAATGTCAGGGCAGACCCCTCAAGGAATAAGGTTGGAATCCCC 660
S I E T P N V R A D P F K E L R L E S P
CACCCGGTCTCTGGTGTGGAAGCCCCAAAAGGAGTAGAAATAAATGCAGAAGCCGGCAA 720
T R S L V M E A P K G V E I N A E A G N
TATGGAAGCCACTGCAGAACAGAGCTGAGACTGGAGTCCAAAGATGGAGAGATTAAGTT 780
M E A T C R T E L R L E S K D G E I K L
AGATGCTGCGAAAATCAAACACCCAGATTGCCTCACGGATCTACACACCCGCGGGAAC 840
D A A K I K L P R L P H G S Y T P A G T
GAGGCAGAAGGCTCTCGAGATCTGCGTTTGTGCCAACGGGAGATTATTCTGTCACAGGC 900
R Q K V F E I C V C A N G R L F L S Q A
AGGAACTGGTTCCACTGTGTCAGATAAACACAAGTGTCTGCCTGTGAgagactatccatag 960
G T G S T C Q I N T S V C L *
tggacactgtcgcagcataaaggccttttttggcttagacctggetgccagctatttt 1020
tactataacacagaagcctatcaaagaccttttgtgtgtgtgtgc 1068

```

**b**

■ Transmembrane domain (Predicted)

```

*****
Human MMPQEYTHHRSTMPGSVGPQVYKVG IYGWRKRCLYFFVLLLMILILVNLAMTIWILKVM
Mouse MPQEYSHHRSTMPSSSEPHIYKVG IYGWRKRCLYFFVLLLMILILVNLAMTIWILKVM
Pig MPQEYTHHRSTMPSSSEGPQVYKVG IYGWRKRCLYFFVLLLMILILVNLAMTIWILKVM
*****
Human NFTIDGMGNLRITEKGLKLEGDSEFLQPLYAKEIQSRPGNALYFKSARNVTVNILNDQTK
Mouse NFTIDGMGNLRITEKGLKLEGDSEFLQPLYAKEIKSRPGNALYFKSARNVTVNILNDQTK
Pig NFTIDGMGNLRITEKGLKLEGDSEFLQPLYAKEIQSRPGNALYFKSARNVTVNILNDQTK
*****
Human VLTQLITGPKAVEAYGKRFVKT VSGKLLFSADNNEVVVGAERLRVLGAEGTVFPKSIET
Mouse VLTQLITGPKAVEAYGKRFVKT VSGKLLFSADNNEVVVGAERLRVLGAEGTVFPKSIET
Pig VLTQLITGPNIEAYGKRFVKT VSGKLLFSADNNEVVVGAERLRVLGAEGTVFPKSIET
*****
Human PNVRADPFKELRLESPTRSLVMEAPKGV E INAEAGNMEATCRTELRLLESKDGEIKLDAAK
Mouse PNVRADPFKELRLESPTRSLVMEAPKGV E INAEAGNMEAI CRSELRLLESKDGEIKLDAAK
Pig PNVRADPFKELRLESPTRSLVMEAPKGV E INAEAGNMEATCRTELRLLESKDGEIKLDAAK
*****
Human IRLPRLPHGSYTPGTRQKVF E ICVCANGRLFLSQAGAGSTCQINTSVCL
Mouse IKLPRLPRGSYTPGTRQKVF E ICVCANGRLFLSQAGAGSTCQINTSVCL
Pig IKLPRLPHGSYTPAGTRQKVF E ICVCANGRLFLSQAGAGSTCQINTSVCL

```

**Supplementary Fig. S1. cDNA and amino acid sequences for porcine *SGCD*.**

**(a)** Pig *SGCD* cDNA and the encoded amino acid sequence. The sequence is available from GenBank under accession number NM\_001144123. The exon/intron boundaries (exons 2–6) are indicated by the inverted black triangle. *Asterisks* indicate termination codons. Uppercase and lowercase letters represent coding and untranslated regions, respectively. **(b)** Amino acid sequences of pig, human, and mouse *SGCD* (GenBank accession numbers: NP\_000328, NP\_036021, and NP\_001137595, respectively). The predicted transmembrane domain is indicated by the shadowed box<sup>1</sup>. *Asterisks* indicate identical amino acids.

**Supplementary Table S1.** The primer sets and PCR conditions used in the genome walking.

| Primers | Sequence (5' – 3')            | Position |                  |
|---------|-------------------------------|----------|------------------|
| SGCD01  | gatttacggctggcggaaaagatgcttg  | Exon2    | sense primer     |
| SGCD02  | gggactggatttctttggcgtacagagg  | Exon3    | antisense primer |
| SGCD03  | tgggaaacttgagaatcacagaaaaagg  | Exon3    | sense primer     |
| SGCD04  | tcagctgagtttagcactttagtctgttc | Exon4    | antisense primer |
| SGCD05  | gccctgtacttcaaactctgccagaaatg | Exon4    | sense primer     |
| SGCD06  | aactctcaatctttcagctcccactacg  | Exon5    | antisense primer |
| SGCD07  | tatggcaaaaagtttgaagtaaagacgg  | Exon5    | sense primer     |
| SGCD08  | ccacttaatcaatgcaaaccatagtcag  | Exon6    | antisense primer |
| SGCD09  | actggtgaacttggccatgaccatctgg  | Exon2    | sense primer     |
| SGCD10  | attctgagtctccttctaacttttagacc | Exon3    | antisense primer |
| SGCD11  | ctaaagttagaaggagactcagaattcc  | Exon3    | sense primer     |
| SGCD12  | ttgaggatgttcacagtaacatttctgg  | Exon4    | antisense primer |
| SGCD13  | ttactgtgaacatcctcaatgaacagac  | Exon4    | sense primer     |
| SGCD14  | gacttcattgttatctgcagagaagagc  | Exon5    | antisense primer |
| SGCD15  | aaattgctcttctctgcagataacaatg  | Exon5    | sense primer     |
| SGCD16  | ccttgaaggggtctgccctgacattagg  | Exon6    | antisense primer |
| AP1     | GTAATACGACTCACTATAGGGC        |          |                  |
| AP2     | ACTATAGGGCACGCGTGGT           |          |                  |

The first PCR amplification using PrimeSTAR HS DNA polymerase (Takara Bio) was performed under the following conditions: denaturation at 98 °C for 60 s, 7 cycles of amplification at 98 °C for 25 s and 68 °C for 3 min, 32 cycles of amplification at 98 °C for 25 s and 64 °C for 3 min, and a final elongation step at 64 °C for 7 min. The nested PCR amplification was performed using PrimeSTAR HS DNA polymerase using the following conditions: denaturation at 98 °C for 60 s, followed by 5 cycles of amplification at 98 °C for 25 s and 68 °C for 3 min, 20 cycles of amplification at 98 °C for 25 s and 64 °C for 3 min, and a final elongation step at 64 °C for 7 min. Amplification conditions: Preheating at 95 °C for 1 min, followed by 30-40 cycles at 94 °C for 20 s, 58 °C (for  $\alpha$ -,  $\beta$ -, and  $\gamma$ -SG) or 55 °C (for *SGCD* and *ACTB*) for 30 s, and 72 °C for 90 s.

**Supplementary Table S2.** Primer sequences for genes confirmed by RT-PCR.

|              | Forward primer        | Reverse primer       |
|--------------|-----------------------|----------------------|
| $\alpha$ -SG | TCCCATACCAGGCTGAGTTC  | CATAGCAGGACAGCAGTGGA |
| $\beta$ -SG  | CATCACTGGCAACAATCAGC  | CACAGGGGTTGTCTGAGGTT |
| $\gamma$ -SG | GCGCTGCCTCTACTTATTCG  | AAGTTTCGATGTGCGTAGGG |
| $\delta$ -SG | GCTTTGTGCGAAGAAGACA   | AAAGGCCTTTATGCTGCGAC |
| Actin        | TCTGGCACCACACCTTCTACA | GCCACGTAGCACAGCTTCTC |

**Supplementary Table S3.** *SGCD* mutations induced by TALEN mRNA in PFF cells.

| Target      | Cell clones analyzed | Event       | Mutation type | No. of cell clones (%) | Cell clones with frameshift mutations (%) |           |
|-------------|----------------------|-------------|---------------|------------------------|-------------------------------------------|-----------|
| <i>SGCD</i> | 177                  | Biallelic   | Deletion      | 4 (2.3)                | 2 (1.1)                                   |           |
|             |                      |             | Insertion     | 0 (0)                  | 0 (0)                                     |           |
|             |                      |             | Complex*      | 0 (0)                  | 0 (0)                                     |           |
|             |                      | Monoallelic | Deletion      | 36 (20.3)              | 22 (12.4)                                 |           |
|             |                      |             | Insertion     | 5 (2.8)                | 5 (2.8)                                   |           |
|             |                      |             | Complex*      | 4 (2.3)                | 2 (1.1)                                   |           |
|             |                      |             | ND**          | 18 (10.2)              | -                                         |           |
|             |                      | Total       |               |                        | 67 (37.9)                                 | 31 (17.5) |

\* deletions, insertions, and/or substitutions

\*\*not determined in detail

**Supplementary Table S4.** Serum biochemical profile of the *SGCD*-KO cloned pigs.

|                |    | SGCD-KO pigs |        | Control WT pig |
|----------------|----|--------------|--------|----------------|
|                |    | M38-4        | M38-5  | (n = 1)        |
| CK (U/L)       |    | 85,500       | 72,350 | 1,199          |
| CK isozyme (%) | BB | 1            | 1      | 9              |
|                | MB | 3            | 2      | 2              |
|                | MM | 96           | 97     | 89             |
| TnT (ng/mL)    |    | 0.193        | 0.300  | 0.010          |
| ANP (pg/mL)    |    | 73.6         | 215.0  | 24.0           |

Serum level of creatine kinase (CK), troponin T (TnT), and atrial natriuretic peptide (ANP) of the *SGCD*-KO pigs at 8 weeks of age was quantitatively analyzed. Creatine kinase was markedly greater in the *SGCD*-KO pigs than in the WT pigs, whereas the proportions of skeletal muscle isozyme in the serum creatine kinase were more than 85% in both *SGCD*-KO and WT pigs. In addition, the serum levels of troponin T and atrial natriuretic peptide were substantially greater in the *SGCD*-KO pigs than the WT pig.

## Reference

1 Jung D, Duclos F, Apostol B, Straub V, Lee JC, Allamand V, et al. Characterization of  $\delta$ -sarcoglycan, a novel component of the oligomeric sarcoglycan complex involved in limb-girdle muscular dystrophy. *J Biol Chem* 1996;271:32321–32329.
